# Supplementary material for: Proton switching as a driving force for the metal–organic complex-mediated growth of gold colloids
Source: Royal Society of Chemistry journal article supplement (doi:10.1039/c6nj01380e), 2016-01-01
Supplement: c6nj01380e1.pdf [file c6nj01380e1.pdf]

## Supporting Information

### **Proton Switching as a Driving Force for the Metal-Organic Complex - Mediated Growth of Gold Colloids**

Geevarghese Vadakken. Jacob, Sanjeeb Sutradhar and Archita Patnaik \*

Department of Chemistry, Indian Institute of Technology Madras, Chennai 600 036, India.

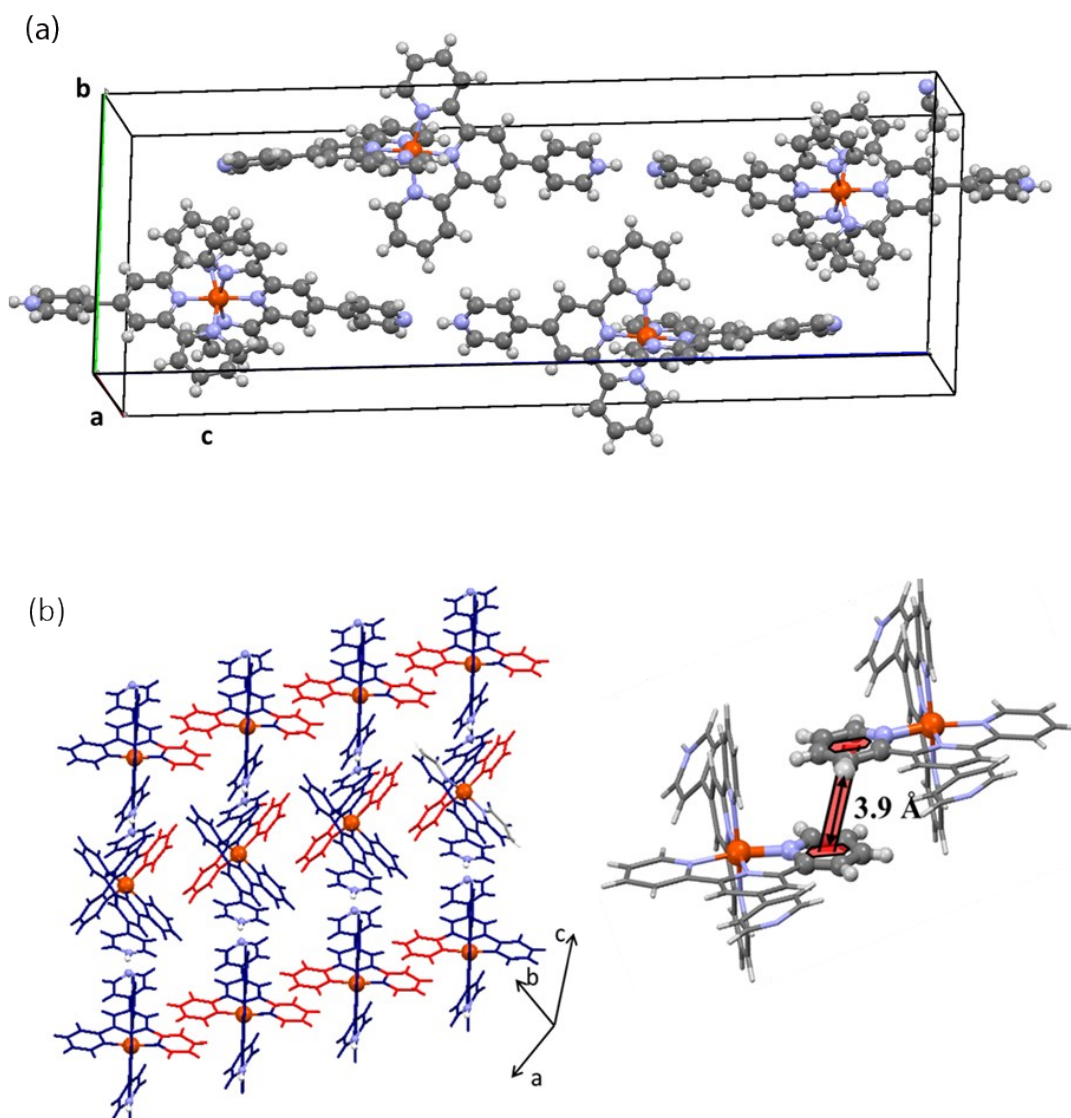

**Fig. S1** (a) Unit cell crystal structure showing 4 units of  $[\text{Fe}(\text{pty})(\text{Hpty})]^{3+}$  complex . (b) Extended unit cell structure showing characteristic twisted  $\pi$ -stacking in the protonated complex.

**Estimation of  $\Delta G$  values for individual proton and electron transfer, along with the coupled process:**

$$\Delta G_{P_1} = G_{[MH]^{4+}} - G_{[M]^{3+}} - G_{[H]^+} \quad (\text{SE1})$$

$$\Delta G_{P_2} = G_{[MH]^{3+}} - G_{[M]^{2+}} - G_{[H]^+} \quad (\text{SE2})$$

$$\Delta G_{red} = G_{[M]^{2+}} - G_{[M]^{3+}} \quad (\text{SE3})$$

$$\Delta G_{red,P} = G_{[MH]^{3+}} - G_{[MH]^{4+}} \quad (\text{SE4})$$

$$\Delta G = G_{[MH]^{3+}} - G_{[M]^{3+}} - G_{[H]^+} \quad (\text{SE5})$$

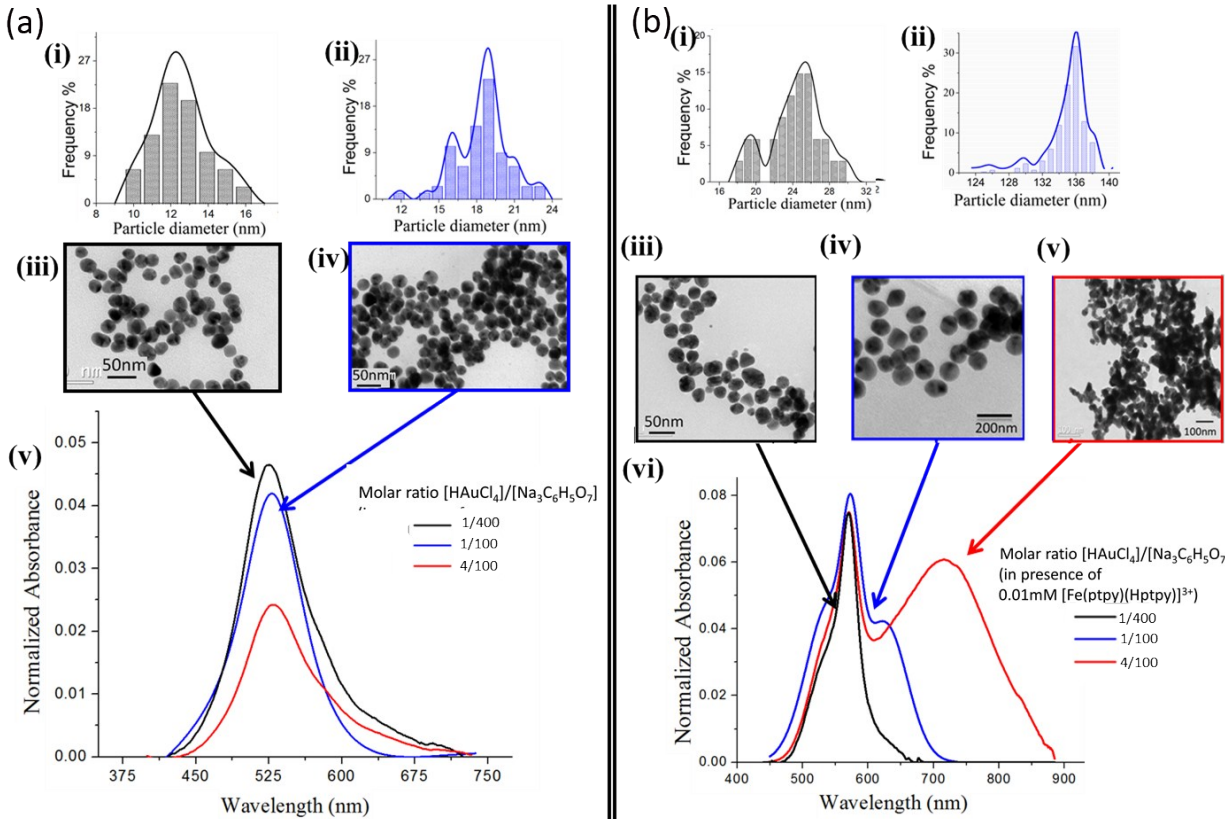

**Fig. S2** Particle size distribution (a(i) and a(ii)), and TEM images (a (iii) and a(iv)) of citrate capped GN showing minimal increase in size from 13 nm to 18nm upon increasing molar ratio of H<sub>2</sub>AuCl<sub>4</sub> to citrate. Similarly, particle size distribution (b(i) and b(ii)), and TEM images of 0.01mM [Fe(pty)(Hpty)]<sup>3+</sup> linked GN with varying molar ratio of H<sub>2</sub>AuCl<sub>4</sub> to citrate [( b(iii) , b(iv))]

showing size enhancement from 24 to 135 nm. The 4/100 molar ratio in b (v) results in agglomeration.

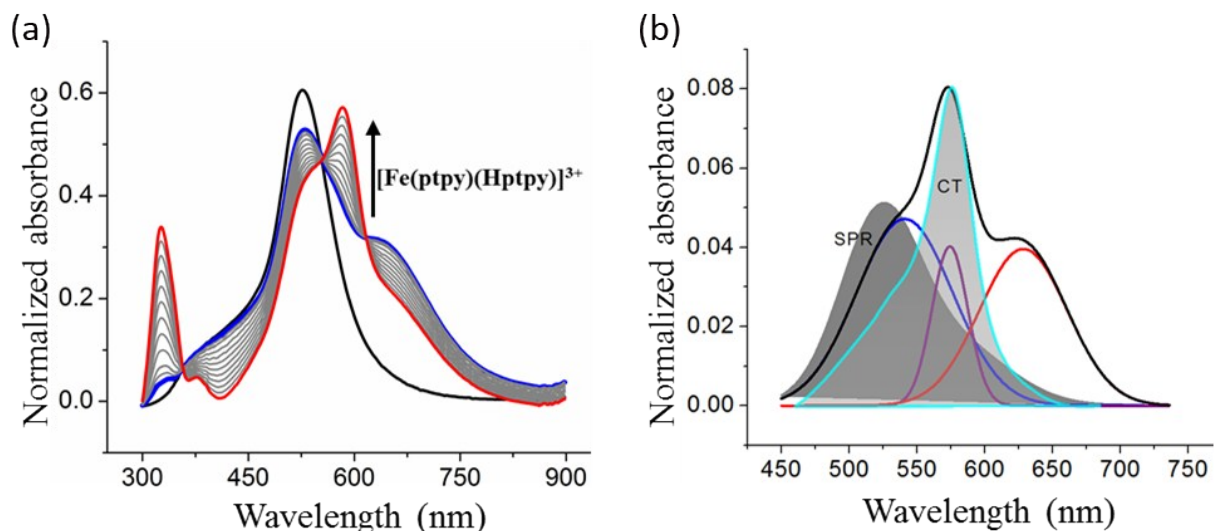

**Fig. S3** (a) UV-vis photometric titration curves of  $(Au)_n$  prepared from 1:100  $HAuCl_4$  (0.01mM) and citrate (1mM), obtained upon successive 200 $\mu$ L addition of 0.01mM  $[Fe(pty)(Hpty)]^{3+}$  complex showing two new rising spectral features at 569 nm (MLCT of complex) and 645 nm (secondary aggregation of nanoparticle) along with decrease in intensity and red shifting of the surface plasmon band. (b) Gaussian fitted spectra of 0.01mM  $[Fe(pty)(Hpty)]^{3+}@$  GN along with bare citrate capped GN and 0.01mM  $[Fe(pty)(Hpty)]^{3+}$  complex in water.

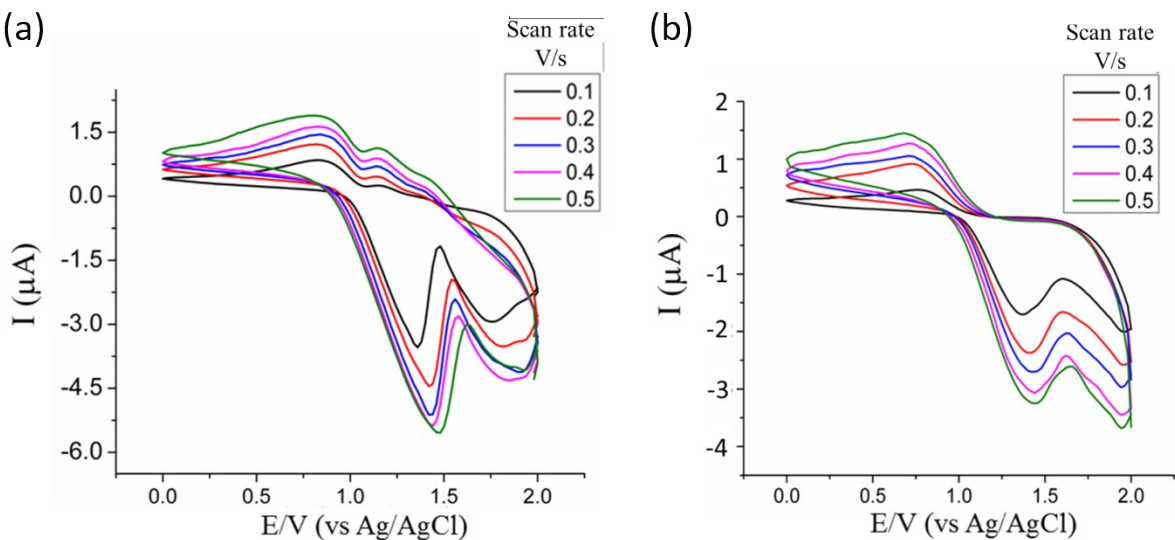

**Fig. S4** Cyclic voltammograms from (a) citrate capped GN and (b) citrate capped  $[Fe(pty)(Hpty)]^{3+}$  linked GN complex modified ITO electrode at different scan rates (0.1 - 0.5  $Vs^{-1}$ ) in 0.1M  $H_2SO_4$  supporting electrolyte.

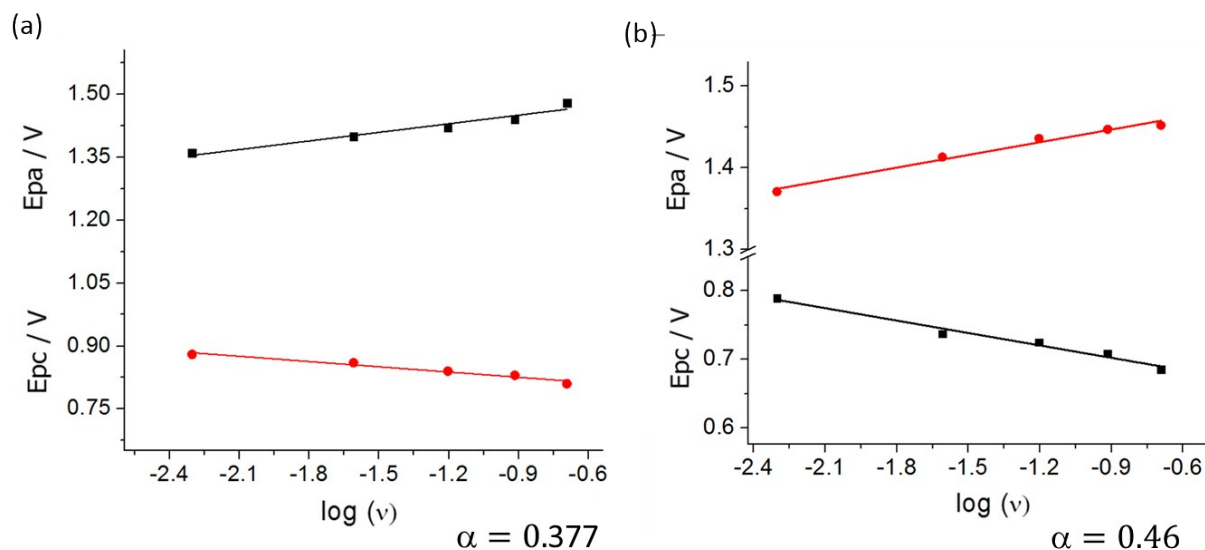

**Fig. S5** (a) and (b) represent the linear variation of cathodic and anodic potentials with scan rate from the ITO modified citrate capped  $\text{Au}_{(n)}$  with and without the complex  $[\text{Fe}(\text{ptpy})(\text{Hptpy})]^{3+}$  respectively.

Laviron formalism:

$$\log k_s = \alpha \log(1 - \alpha) + (1 - \alpha) \log \alpha - \log \frac{RT}{nF\nu} - \frac{\alpha(1 - \alpha)nF\Delta E_p}{2.3RT} \quad (\text{SE6})$$
